# Supplementary material for: Selenoprotein P is the essential selenium transporter for bones
Source: Royal Society of Chemistry journal article supplement (doi:10.1039/c4mt00003j), 2014-01-01
Supplement: c4mt00003j1.pdf [file c4mt00003j1.pdf]

## **Selenoprotein P is the essential selenium transporter for bone**

**Nicole Pietschmann,<sup>a,b</sup> Eddy Rijntjes,<sup>a</sup> Antonia  
Hoeg,<sup>a,b</sup> Mette Stodter,<sup>a</sup> Ulrich Schweizer<sup>c</sup>, Petra  
5 Seemann,<sup>d</sup> and Lutz Schomburg<sup>a</sup>**

*Received (in XXX, XXX) Xth XXXXXXXXXX 20XX, Accepted  
Xth XXXXXXXXXX 20XX*

DOI: 10.1039/b000000x

Suppl. Table S1:

| Gene      | forward (5' - 3')      | reverse (5' - 3')       |
|-----------|------------------------|-------------------------|
| 18S       | ttgacggaaggcaccaccag   | gcaccaccaccacggaatcg    |
| Gpx1      | atcagttcggacaccaggag   | cattccgcaggaaggtaaag    |
| Gpx2      | tcactctgaggaacaactacc  | gatctcctcgttctgacagttc  |
| 10 Gpx3   | aaacaggagccagcgagaact  | cccgttcacatctcctttcaaa  |
| Gpx4      | atgccatcaaatggaactttac | gtgtaggggcacacactgtga   |
| Dio1      | ccagtactctggtttgtctg   | gaggcaaatgcatctacgagtc  |
| Dio2      | ttcctcctagatgcctacaac  | ttctccgaggcataattgttac  |
| Dio3      | ctccaaagaaagtcaaaaggtg | caaaaacgtcaaaaaggagtc   |
| 15 Txnr1  | caaatftgacaagaagtgtctg | agtcatgcttcactgtgtcttc  |
| Txnr2     | gcaaatgtcatcttgtgtcac  | cttctccagattcaaagctctg  |
| Txnr3     | cagttggagaaagttaccag   | tccccaatgacataaacatgag  |
| Sephs2    | tagctftgtccaatgtgtctc  | taatccacgggtgaccact     |
| Sepp      | gftgaagaagccattaagatcg | attctctgaaggcttactgctg  |
| 20 Sepx   | aggttttccagaatcactctg  | tttagggacgaacttcagtgag  |
| Sepr      | tgtaagcatgttccatccac   | ctgaagtcacgagatgtgtgtag |
| Sep15     | atggtcgcctaactaacactc  | cagacccccttgaaacg       |
| Sepw      | cagctcaaggagaagctagaac | ggaactgtctctgtatccac    |
| Selh      | ggcattgagcattgtacgag   | tctcaattctcaaccacctc    |
| 25 Seli   | ctftgaaactggtactgcttcc | tttggttctcaatgaaaaag    |
| Selk      | gcctgactgatacgagttc    | atggcttgaaaaagccagac    |
| Selm      | atgacagttgaatcgctaaag  | gagtggtgctctctagttc     |
| Selo      | aaactgacaacatgagcattg  | ggaactcagtgcaactcctc    |
| Selt      | ggcttaataattgttgcaaag  | tatctcaaatgcacctgtgtac  |
| 30 Selv   | gttccactaaggagatcccatc | ctttctcttggaatggatcag   |
| Seps      | ctaaatgcccaagttgaaaaac | ttgggatgacagatgaagtag   |
| SBP2      | accgaagcttcacagtaaacag | cactgctccaactgagaacac   |
| Selenbp1  | caaatgacagatgggctgatac | gaagtaaggaagcggctc      |
| Fabp1     | aaactcaccatcacctatggac | tagcctgtctaaattctcttgc  |
| 35 eIF4a3 | ggtttcaaggagcagatctatg | aaatttccattcctctcttcc   |
| Ncl       | gftctatgaaagccaagagtg  | tgattaaggtttccaatgaac   |
| Secp43    | accagaactactatgccagtg  | attatctaggcctctgccttc   |
| Lrp1      | cggccatggactcagttat    | gtccagcagagtgacacagg    |
| Lrp2      | ccttttcactgctctagctcac | ttcacaggtctgtatcattg    |
| 40 Lrp8   | gtcggatgagcctcagaag    | caggggtgcatcactca       |

75

Suppl. Table S2:

*In silico* analysis of transcript levels in osteoblasts vs. osteoclasts<sup>1</sup>

| Osteoblasts                  | Osteoclasts            | Osteoblasts               | Osteoclasts            |
|------------------------------|------------------------|---------------------------|------------------------|
| <i>Gpx1</i>                  | < <b><i>Gpx1</i></b>   | <i>Sbp2</i>               | < <b><i>Sbp2</i></b>   |
| <i>Gpx2</i>                  | < <b><i>Gpx2</i></b>   | <b><i>Sebp1</i></b>       | > <i>Sebp1</i>         |
| <b><i>Gpx3</i></b>           | > <i>Gpx3</i>          | <i>Secp43</i>             | < <b><i>Secp43</i></b> |
| <i>Gpx4</i>                  | < <b><i>Gpx4</i></b>   | <i>Eif4a3</i>             | < <b><i>Eif4a3</i></b> |
| <i>Dio1</i> ; background     |                        | <i>Fabp1</i> ; background |                        |
| <b><i>Dio2</i></b>           | > <i>Dio2</i>          | <i>Ncl</i>                | < <b><i>Ncl</i></b>    |
| <i>Dio3</i> ; no information |                        | <i>Lrp1</i>               | < <b><i>Lrp1</i></b>   |
| <i>Txnr1</i>                 | < <b><i>Txnr1</i></b>  | <i>Lrp2</i> ; background  |                        |
| <i>Txnr2</i>                 | < <b><i>Txnr2</i></b>  | <i>Lrp8</i>               | < <b><i>Lrp8</i></b>   |
| <i>Txnr3</i>                 | < <b><i>Txnr3</i></b>  |                           |                        |
| <i>Sephs2</i>                | < <b><i>Sephs2</i></b> |                           |                        |
| <b><i>Sepp</i></b>           | > <i>Sepp</i>          |                           |                        |
| <i>Selr</i>                  | < <b><i>Selr</i></b>   |                           |                        |
| <b><i>Sepr</i></b>           | > <i>Sepr</i>          |                           |                        |
| <b><i>Sep15</i></b>          | > <i>Sep15</i>         |                           |                        |
| <b><i>Sepw</i></b>           | > <i>Sepw</i>          |                           |                        |
| <i>Selh</i>                  | < <b><i>Selh</i></b>   |                           |                        |
| <i>Seli</i>                  | < <b><i>Seli</i></b>   |                           |                        |
| <b><i>Selk</i></b>           | > <i>Selk</i>          |                           |                        |
| <b><i>Selm</i></b>           | > <i>Selm</i>          |                           |                        |
| <i>Selo</i>                  | < <b><i>Selo</i></b>   |                           |                        |
| <i>Selt</i> ; background     |                        |                           |                        |
| <i>Selv</i> ; background     |                        |                           |                        |
| <b><i>Sels</i></b>           | > <i>Sels</i>          |                           |                        |

<sup>1</sup>Data are retrieved from the BioGPS database (biogps.org). Genes in bold letters denote relatively strong expression.

45

50

55

60

65

70
